# Supplementary material for: NCN-pincer organopnictogen(iii) bis(aryloxides)
Source: Royal Society of Chemistry journal article supplement (doi:10.1039/d3nj05840a), 2024-01-01
Supplement: d3nj05840a2.pdf [file d3nj05840a2.pdf]

Electronic Supporting Information

**NCN-pincer organopnictogen(III) bis(aryloxides)**

Gabriel Duneş and Cristian Silvestru

Supramolecular Organic and Organometallic Chemistry Centre, Department of Chemistry, Faculty of Chemistry and Chemical Engineering, Babeş-Bolyai University, 11 Arany Janos, 400028 Cluj-Napoca, Romania.

Fax: (+40) 264-590818, Tel: (+40) 264-593833; E-mail: [cristian.silvestru@ubbcluj.ro](mailto:cristian.silvestru@ubbcluj.ro)

Table of Contents

|                                                                                                                                                                                                                                                                                                                         |                               |
|-------------------------------------------------------------------------------------------------------------------------------------------------------------------------------------------------------------------------------------------------------------------------------------------------------------------------|-------------------------------|
| <b>Scheme S1.</b> Full numbering scheme for NMR assignments.....                                                                                                                                                                                                                                                        | S3                            |
| Representative NMR spectra .....                                                                                                                                                                                                                                                                                        | S4                            |
| <b>Figure S1.</b> $^1\text{H}$ NMR spectrum of <b>3</b> ( $\text{C}_6\text{D}_6$ , 400 MHz) at r.t.....                                                                                                                                                                                                                 | S4                            |
| <b>Figure S2.</b> $^{13}\text{C}\{^1\text{H}\}$ NMR spectrum of <b>3</b> ( $\text{C}_6\text{D}_6$ , 101 MHz) at r.t.....                                                                                                                                                                                                | S4                            |
| <b>Figure S3.</b> $^1\text{H}$ NMR spectrum of <b>4</b> ( $\text{CD}_3\text{CN}$ , 400 MHz) at r.t. (* denotes residual <i>n</i> -hexane).....                                                                                                                                                                          | S5                            |
| <b>Figure S4.</b> $^{13}\text{C}\{^1\text{H}\}$ NMR spectrum of <b>4</b> ( $\text{CD}_3\text{CN}$ , 101 MHz) at r.t. ....                                                                                                                                                                                               | S5                            |
| <b>Figure S5.</b> $^1\text{H}$ NMR spectrum of <b>5</b> ( $\text{C}_6\text{D}_6$ , 400 MHz) at r.t. (* denotes residual <i>n</i> -hexane).....                                                                                                                                                                          | S6                            |
| <b>Figure S6.</b> $^{13}\text{C}\{^1\text{H}\}$ NMR spectrum of <b>5</b> ( $\text{C}_6\text{D}_6$ , 101 MHz) at r.t.....                                                                                                                                                                                                | S6                            |
| Crystallographic data.....                                                                                                                                                                                                                                                                                              | S7                            |
| Table S1. Experimental metrical parameters in compounds <b>3</b> and <b>5</b> .....                                                                                                                                                                                                                                     | SError! Bookmark not defined. |
| Table S2. Selected X-ray data collection.....                                                                                                                                                                                                                                                                           | S7                            |
| <b>Figure S7.</b> Molecular structure of isomer ( $pR_{N1},pR_{N1'}$ )- <b>3</b> showing the intramolecular C–H···O and C–H··· $\pi$ ( $A_{r_{\text{centroid}}}$ ) contacts.<br>.....                                                                                                                                   | S8                            |
| <b>Figure S8.</b> Chain polymer built through intra- and intermolecular C–H··· $\pi$ ( $A_{r_{\text{centroid}}}$ ) contacts between alternating ( $pR_{N1},pR_{N1'}$ )- and ( $pS_{N1},pS_{N1'}$ )- <b>3</b> isomers in the crystal of <b>3</b> .....                                                                   | S8                            |
| <b>Figure S9.</b> Molecular structure of isomer ( $pS_{N1},pS_{N1'}$ )- <b>5</b> showing the intramolecular C–H···O contacts.....                                                                                                                                                                                       | S9                            |
| <b>Figure S10.</b> View along axis <i>c</i> of the chain polymer built through intermolecular C–H···O contacts between ( $pS_{N1},pS_{N1'}$ )- <b>5</b> isomers in the crystal of <b>5</b> .....                                                                                                                        | S9                            |
| <b>Figure S11.</b> View along axis <i>c</i> of a layer built through intermolecular C–H··· $\pi$ ( $A_{r_{\text{centroid}}}$ ) contacts between chain polymers of ( $pS_{N1},pS_{N1'}$ )- <b>5</b> isomers in the crystal of <b>5</b> .....                                                                             | S9                            |
| <b>Figure S12.</b> View along axis <i>c</i> of a 3D supramolecular associations built through intermolecular C–H··· $\pi$ ( $A_{r_{\text{centroid}}}$ ) contacts between alternating layers of ( $pS_{N1},pS_{N1'}$ )- <b>5</b> isomers and layers of ( $pR_{N1},pR_{N1'}$ )- <b>5</b> in the crystal of <b>5</b> ..... | S10                           |

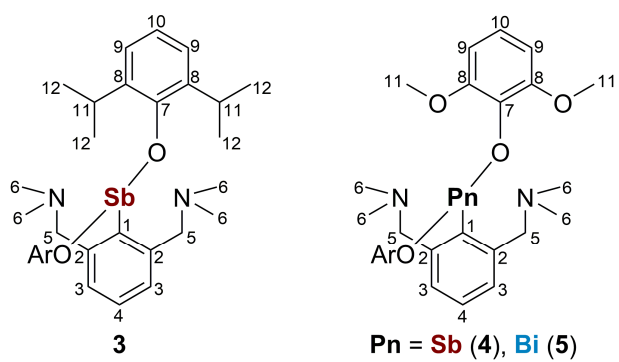

**Scheme S1.** Full numbering scheme for NMR assignments.

## Representative NMR spectra

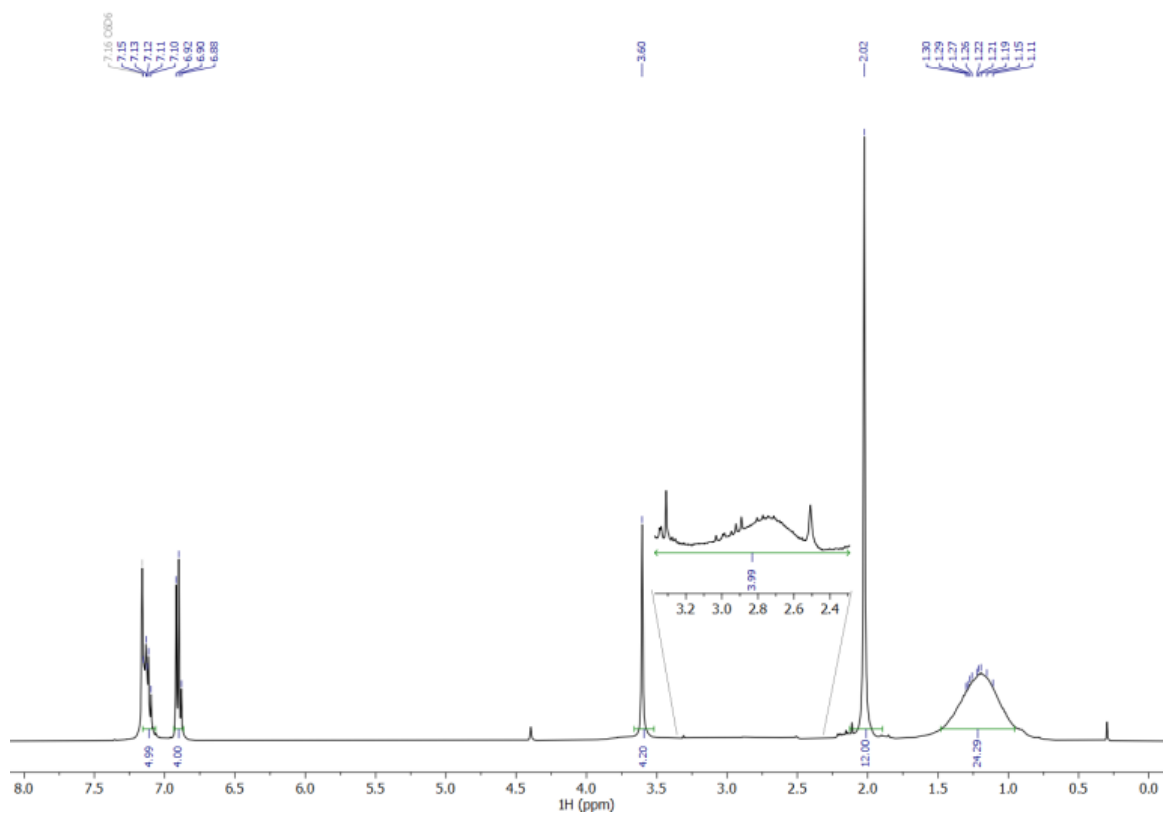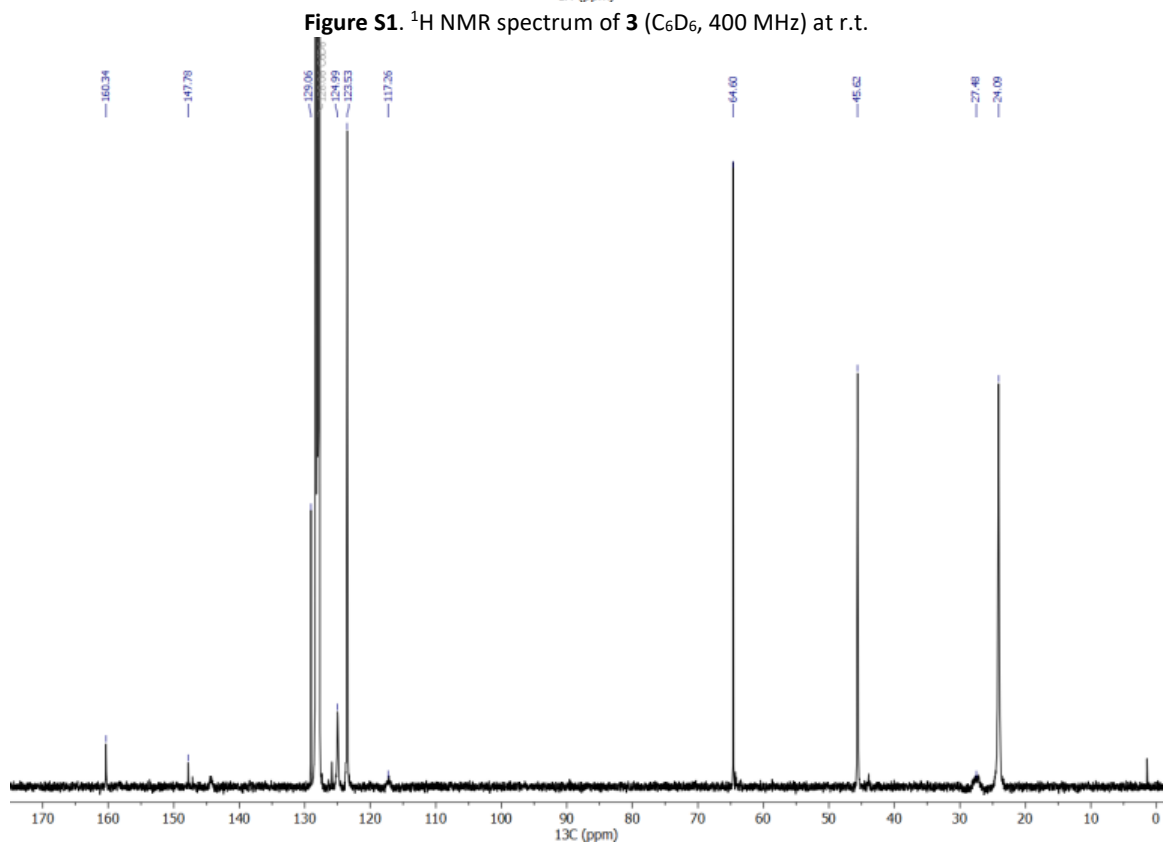

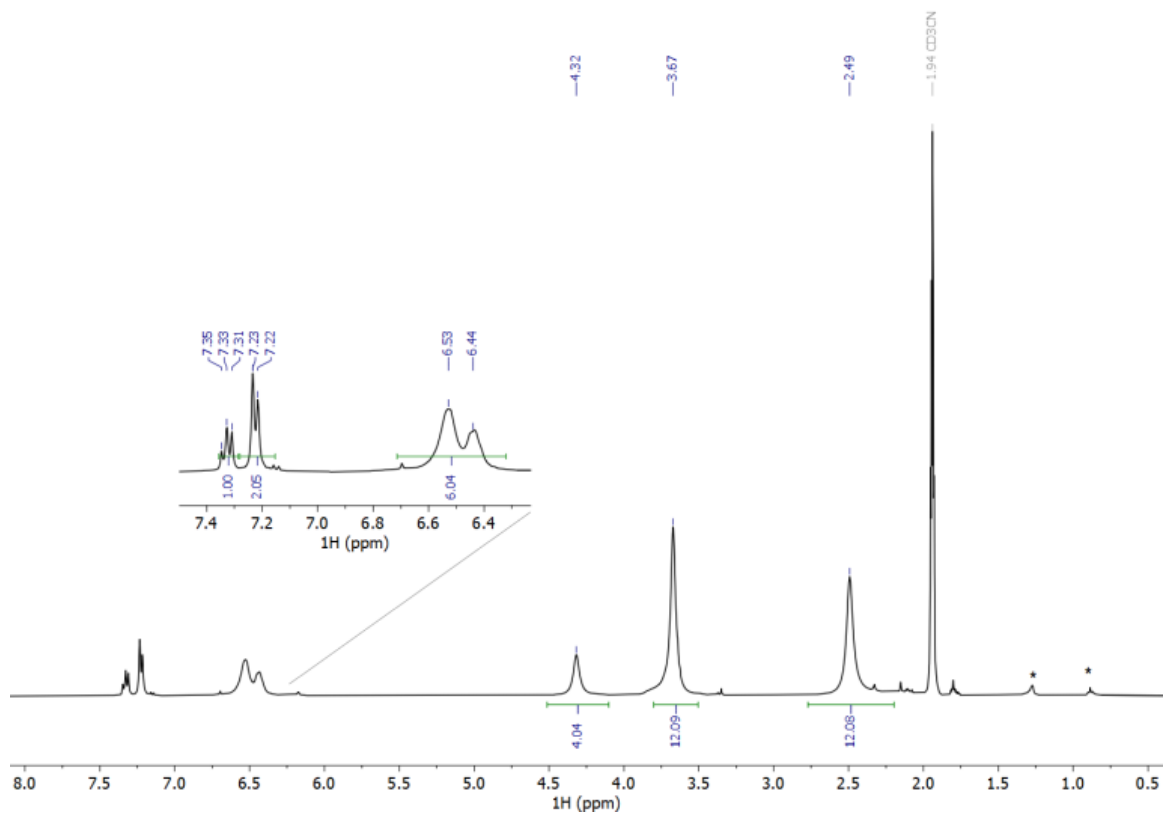

**Figure S3.**  $^1\text{H}$  NMR spectrum of **4** ( $\text{CD}_3\text{CN}$ , 400 MHz) at r.t. (\* denotes residual *n*-hexane).

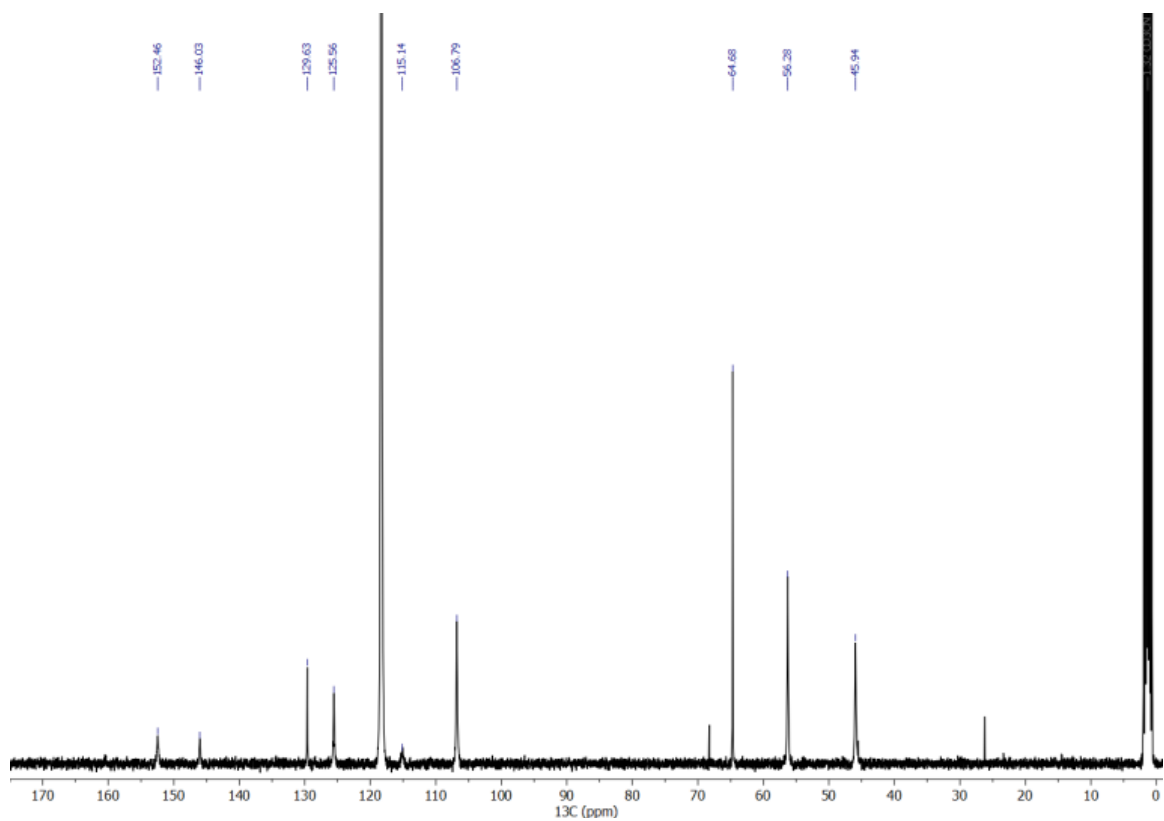

**Figure S4.**  $^{13}\text{C}\{^1\text{H}\}$  NMR spectrum of **4** ( $\text{CD}_3\text{CN}$ , 101 MHz) at r.t.

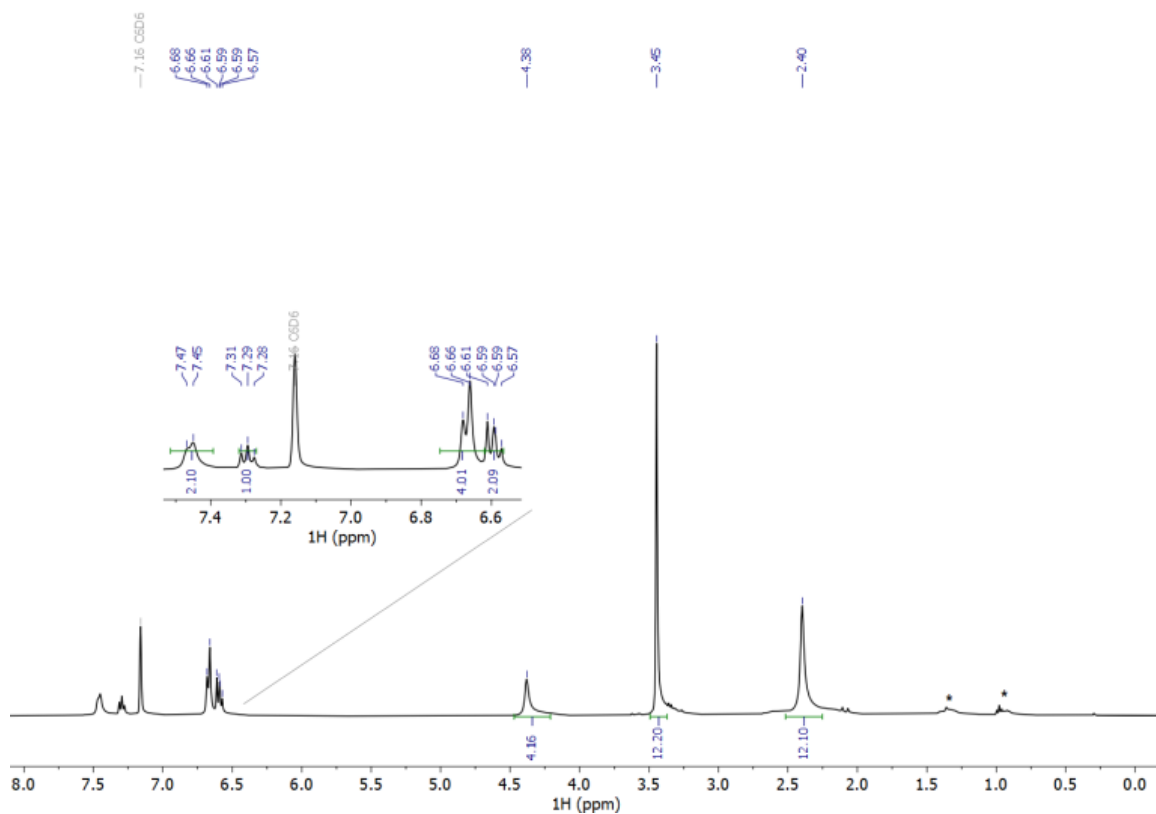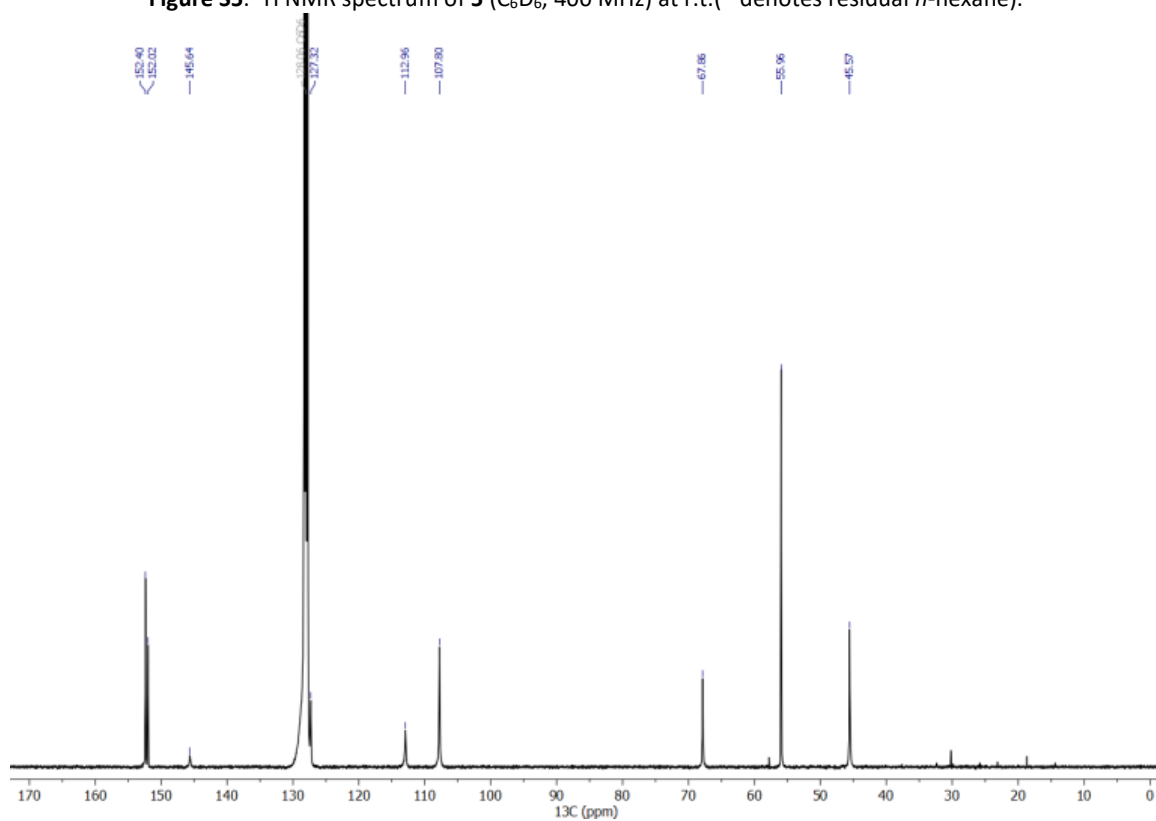

## Crystallographic data

**Table S1.** Selected X-ray data collection.

| Compound                                            | 3                                                                 | 5                                                                 |
|-----------------------------------------------------|-------------------------------------------------------------------|-------------------------------------------------------------------|
| Empirical formula                                   | C <sub>36</sub> H <sub>53</sub> N <sub>2</sub> O <sub>2</sub> Sb  | C <sub>28</sub> H <sub>37</sub> N <sub>2</sub> O <sub>6</sub> Bi  |
| Formula weight                                      | 667.55                                                            | 706.57                                                            |
| Crystal size /mm                                    | 0.090 x 0.070 x 0.060                                             | 0.180 x 0.100 x 0.090                                             |
| Crystal habit                                       | clear colourless                                                  | yellow block                                                      |
| Wavelength (Å)                                      | 0.71073                                                           | 0.71073                                                           |
| Temperature (K)                                     | 100.(2)                                                           | 100.(2)                                                           |
| Crystal system                                      | monoclinic                                                        | monoclinic                                                        |
| Space group                                         | C2/c                                                              | C2/c                                                              |
| a (Å)                                               | 18.6622(10)                                                       | 14.6780(9)                                                        |
| b (Å)                                               | 10.6493(5)                                                        | 22.2864(13)                                                       |
| c (Å)                                               | 17.3555(9)                                                        | 9.5439(6)                                                         |
| α (°)                                               | 90                                                                | 90                                                                |
| β (°)                                               | 95.402(2)                                                         | 117.719(2)                                                        |
| γ (°)                                               | 90                                                                | 90                                                                |
| Volume (Å <sup>3</sup> )                            | 3433.9(3)                                                         | 2763.7(3)                                                         |
| Z                                                   | 4                                                                 | 4                                                                 |
| Density (calculated) (g cm <sup>-3</sup> )          | 1.291                                                             | 1.698                                                             |
| Absorption coefficient (mm <sup>-1</sup> )          | 0.835                                                             | 6.423                                                             |
| <i>F</i> (000)                                      | 1400                                                              | 1400                                                              |
| θ range for data collections (°)                    | 2.19-30.67                                                        | 3.15-43.19                                                        |
| T <sub>max</sub> / T <sub>min</sub>                 | 0.93 / 0.95                                                       | 0.47 / 0.56                                                       |
| Reflections collected                               | 55025                                                             | 135024                                                            |
| Independent reflections, <i>R</i> <sub>int</sub>    | 3754, 0.0559                                                      | 10348, 0.0296                                                     |
| Miller indices, h, k, l (min/max)                   | -23/23, -13/13, -22/22                                            | -28/28, -42/42, -17/18                                            |
| Completeness to θ                                   | 100%                                                              | 99.8%                                                             |
| Refinement method                                   | Full-matrix least-squares on <i>F</i> <sup>2</sup>                | Full-matrix least-squares on <i>F</i> <sup>2</sup>                |
| Data / restraints / parameters                      | 3754 / 0 / 193                                                    | 10348 / 0 / 173                                                   |
| Goodness-of-fit on <i>F</i> <sup>2</sup>            | 1.052                                                             | 1.140                                                             |
| Final <i>R</i> indices [ <i>I</i> > 2σ( <i>I</i> )] | <i>R</i> <sub>1</sub> = 0.0202<br><i>wR</i> <sub>2</sub> = 0.0437 | <i>R</i> <sub>1</sub> = 0.0121<br><i>wR</i> <sub>2</sub> = 0.0323 |
| <i>R</i> indices (all data)                         | <i>R</i> <sub>1</sub> = 0.0252<br><i>wR</i> <sub>2</sub> = 0.0460 | <i>R</i> <sub>1</sub> = 0.0131<br><i>wR</i> <sub>2</sub> = 0.0325 |
| Largest diff. peak and hole, eÅ <sup>-3</sup>       | 0.433, -0.296                                                     | 1.102, -1.205                                                     |
| <b>CCDC No.</b>                                     | <b>2176504</b>                                                    | <b>2176505</b>                                                    |

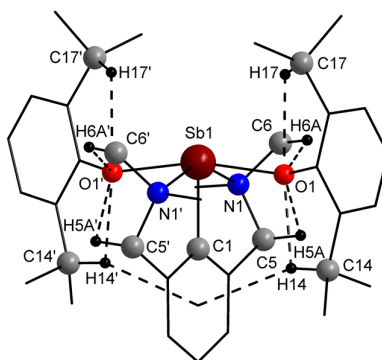

**Figure S7.** Molecular structure of isomer ( $pR_{N1}, pR_{N1'}$ )-**3** showing the intramolecular C–H $\cdots$ O and C–H $\cdots$  $\pi$  ( $Ar_{\text{centroid}}$ ) contacts (only hydrogen atoms involved in intramolecular contacts are shown) [symmetry equivalent atoms ( $1-x, y, 1.5-z$ ) are given by “prime”].

|                            |                                                                                               |        |                           |
|----------------------------|-----------------------------------------------------------------------------------------------|--------|---------------------------|
| - intramolecular distances | C(14)–H(14) <sub>methanetriyl</sub> $\cdots$ O(1)                                             | 2.39 Å |                           |
|                            | C(17)–H(17) <sub>methanetriyl</sub> $\cdots$ O(1)                                             | 2.44 Å |                           |
|                            | C(6)–H(6a) <sub>methyl</sub> $\cdots$ O(1)                                                    | 2.55 Å |                           |
|                            | C(5)–H(5a) <sub>methylene</sub> $\cdots$ O(1)                                                 | 2.63 Å |                           |
|                            | C(14)–H(14) <sub>methanetriyl</sub> $\cdots$ Ar <sub>centroid</sub> {C(1)–C(4), C(2'), C(3')} | 2.83 Å | ( $\gamma = 21.0^\circ$ ) |

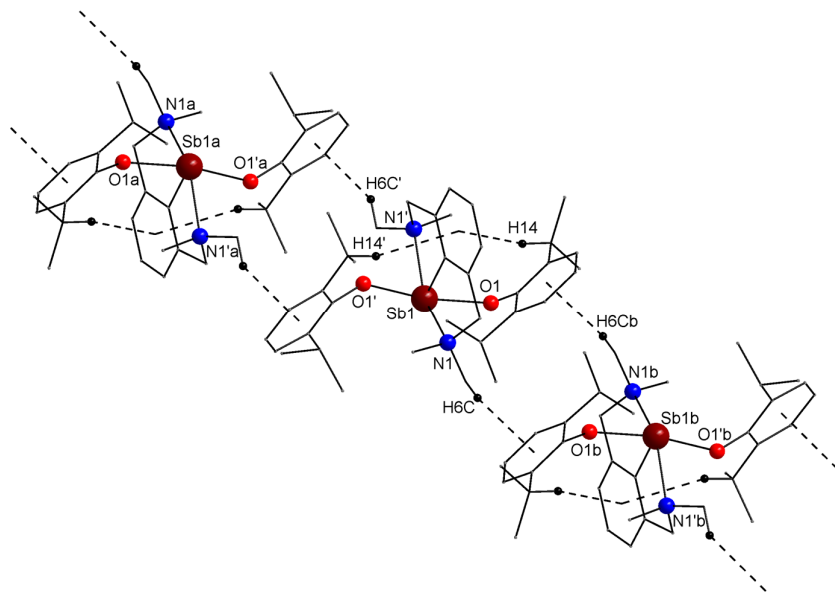

**Figure S8.** Chain polymer built through intra- and intermolecular C–H $\cdots$  $\pi$  ( $Ar_{\text{centroid}}$ ) contacts between alternating ( $pR_{N1}, pR_{N1'}$ )- and ( $pS_{N1}, pS_{N1'}$ )-**3** isomers in the crystal of **3** (only hydrogen atoms involved in intra- and intermolecular contacts are shown) [symmetry equivalent atoms ( $1-x, y, 1.5-z$ ), ( $1-x, 1-y, 2-z$ ), ( $x, 1-y, 0.5+z$ ), ( $1-x, 1-y, 1-z$ ) and ( $x, 1-y, -0.5+z$ ) are given by “prime”, “a”, “prime a”, “b” and “prime b”].

|                            |                                                                               |        |                          |
|----------------------------|-------------------------------------------------------------------------------|--------|--------------------------|
| - intermolecular distances | C(6b)–H(6Cb) <sub>N-methyl</sub> $\cdots$ Ar <sub>centroid</sub> {C(8)–C(13)} | 2.63 Å | ( $\gamma = 6.1^\circ$ ) |
|----------------------------|-------------------------------------------------------------------------------|--------|--------------------------|



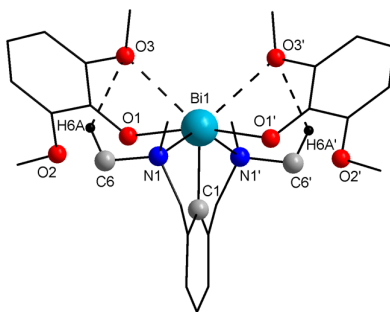

**Figure S9.** Molecular structure of isomer ( $pS_{N1}, pS_{N1'}$ )-**5** showing the intramolecular C–H...O contacts (only hydrogen atoms involved in intramolecular contacts are shown) [symmetry equivalent atoms ( $1-x, y, 0.5-z$ ) are given by “prime”].

- intramolecular distances      C(6)–H(6A)<sub>N-methyl</sub>...O(3)      2.62 Å

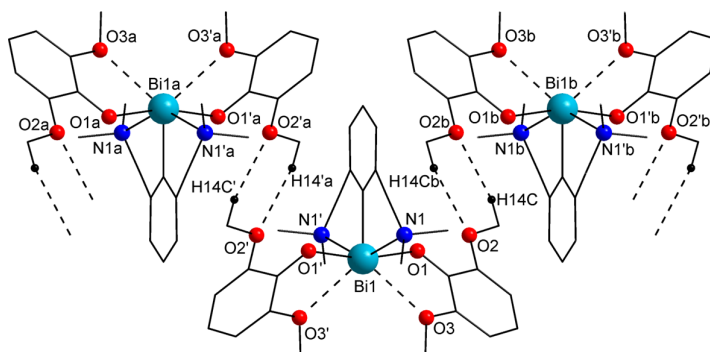

**Figure S10.** View along axis *c* of the chain polymer built through intermolecular C–H...O contacts between ( $pS_{N1}, pS_{N1'}$ )-**5** isomers in the crystal of **5** (only hydrogen atoms involved in intermolecular contacts are shown) [symmetry equivalent atoms ( $1-x, y, 0.5-z$ ), ( $0.5-x, 1.5-y, 1-z$ ), ( $-0.5+x, 1.5-y, 0.5+z$ ), ( $1.5-x, 1.5-y, -z$ ) and ( $0.5+x, 1.5-y, -0.5+z$ ) are given by “prime”, “a”, “prime a”, “b” and “prime b”].

- intermolecular distances      C(14)–H(14C)<sub>O-methyl</sub>...O(2b)      2.48 Å

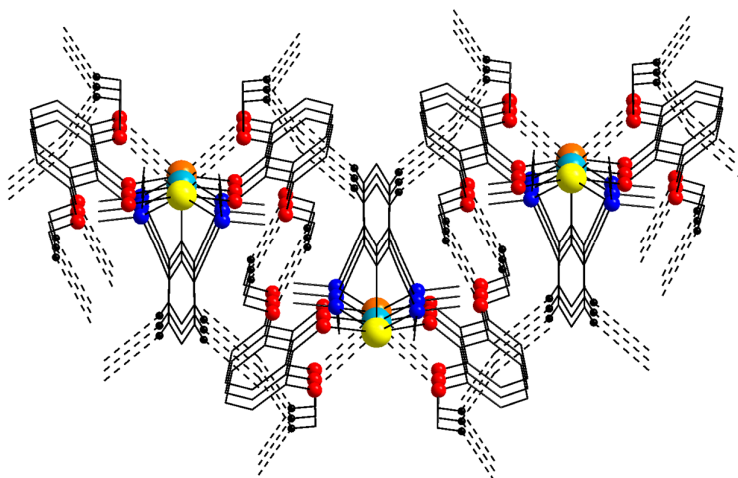

**Figure S11.** View along axis *c* of a layer built through intermolecular C–H... $\pi$  ( $Ar_{\text{centroid}}$ ) contacts between chain polymers of ( $pS_{N1}, pS_{N1'}$ )-**5** isomers in the crystal of **5** (only hydrogen atoms involved in intermolecular contacts are shown) [symmetry equivalent atoms ( $1.5-x, 1.5-y, 1-z$ ) are given by “c”].

- intermolecular distances      C(3)–H(3)<sub>aryl</sub>... $Ar_{\text{centroid}}\{C(8c)-C(13c)\}$  2.75 Å      ( $\gamma = 2.7^\circ$ )

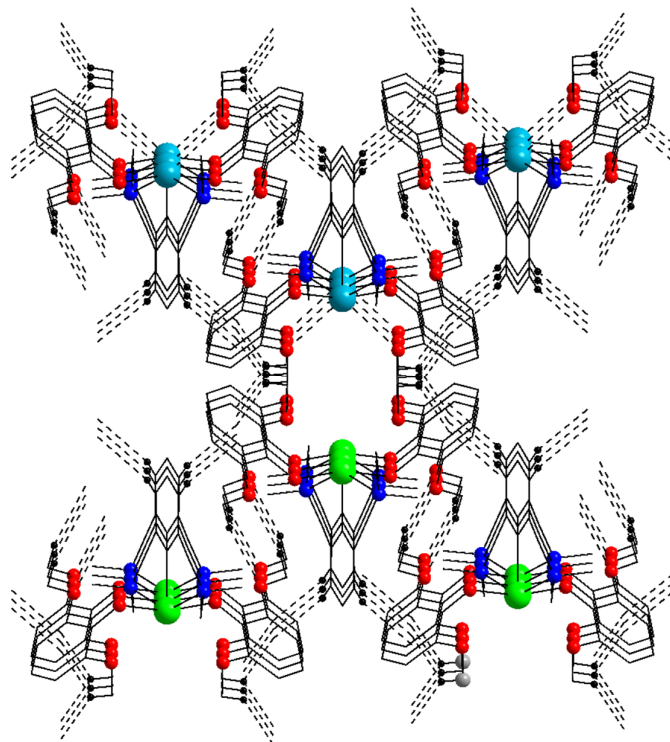

**Figure S12.** View along axis *c* of a 3D supramolecular association built through intermolecular C–H⋯π ( $A_{\text{centroid}}$ ) contacts between alternating layers of ( $pS_{N1}, pS_{N1'}$ )-**5** isomers (Bi atoms in light blue color) and layers of ( $pR_{N1}, pR_{N1'}$ )-**5** isomers (Bi atoms in green color) in the crystal of **5** (only hydrogen atoms involved in intermolecular contacts are shown [symmetry equivalent atoms] ( $x, 1-y, -0.5+z$ ) are given by “d”).

- intermolecular distances      C(15c)–H(15Bc)<sub>methyl</sub>⋯ $A_{\text{centroid}}$ {C(8)–C(13)}      2.48 Å      ( $\gamma = 7.3^\circ$ )
